# Supplementary material
Source: MDPI journal article supplement (https://www.mdpi.com/1999-4907/15/1/77)
Supplement: s1 [file s1]

## Supplementary Materials

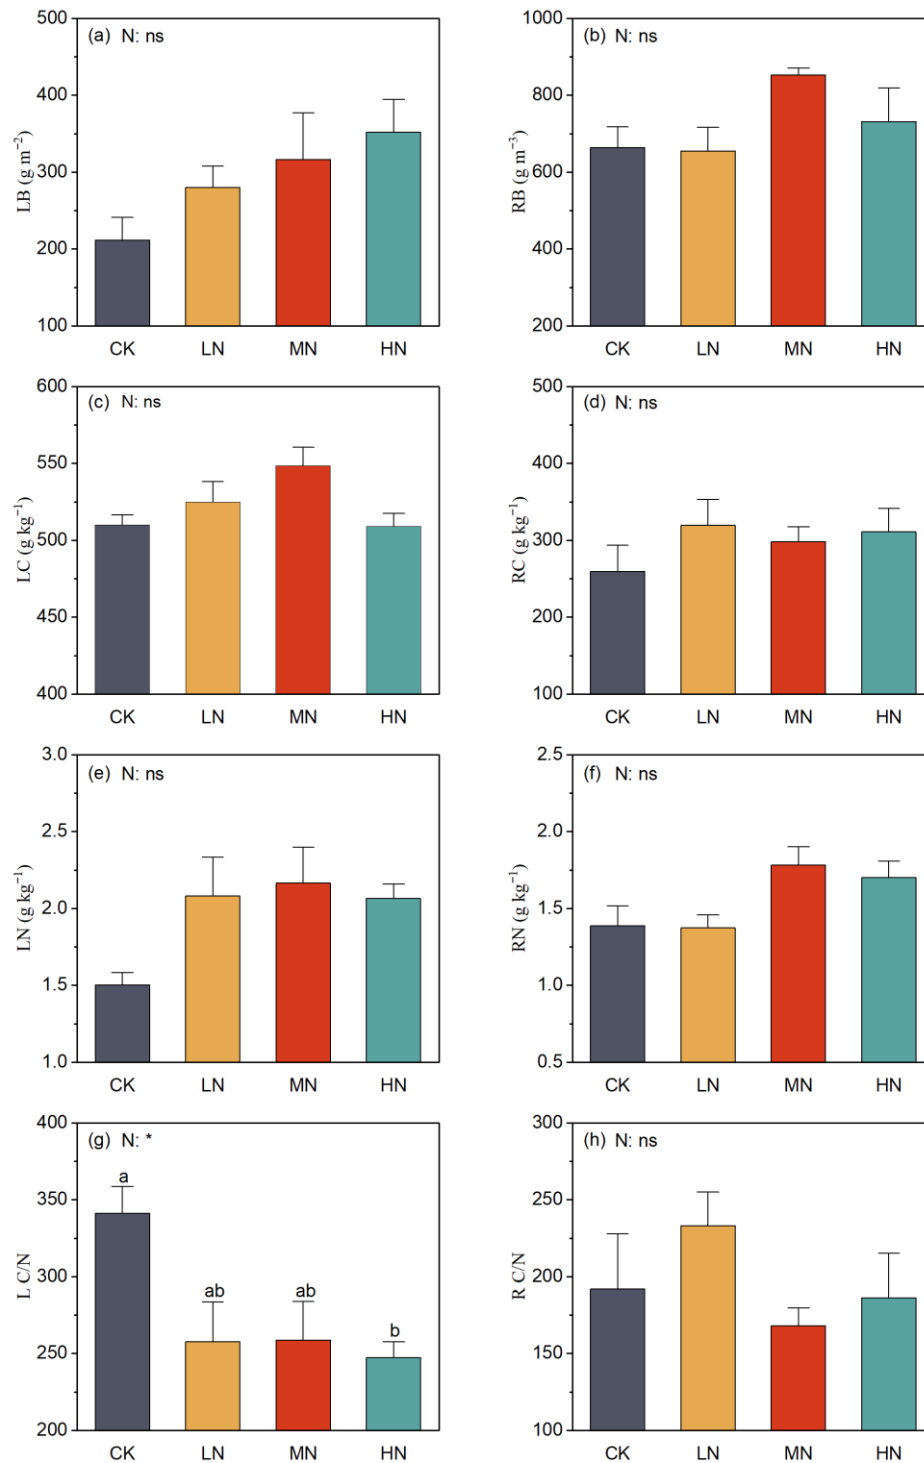

**Figure S1** Distributions of LB (a), LC (c), LN (e), LC/N (g), RB (b), RC (d), RN (f), RC/N (h) under different N enrichment levels. Different lowercase letters indicate the significant difference among N enrichment levels ( $p < 0.05$ ). LB, litter biomass. LC, litter organic carbon. LN, litter total nitrogen. LC/N, LC/LN ratio. RB, fine root biomass. RC, fine root organic carbon. RN, fine root total nitrogen. RC/N, RC/RN ratio. \*  $p < 0.05$ , ns non-significant.

**Table S1** Permutational multivariate analysis of variance (PERMANOVA) of soil aggregated-associated bacterial communities under different N enrichment levels. \*\*  $p < 0.01$ .

| Pairwise comparison | R <sup>2</sup> | $p$   | $p_{\text{adj}}$ (Benjamini) |
|---------------------|----------------|-------|------------------------------|
| CK vs. LN           | 0.076          | 0.065 | 0.065                        |
| CK vs. MN           | 0.101          | 0.002 | 0.003 **                     |
| CK vs. HN           | 0.153          | 0.001 | 0.002 **                     |
| LN vs. MN           | 0.092          | 0.003 | 0.004 **                     |
| LN vs. HN           | 0.137          | 0.001 | 0.002 **                     |
| MN vs. HN           | 0.115          | 0.001 | 0.002 **                     |

**Table S2** Topological properties of soil aggregated-associated bacterial co-occurrence networks.

|                                | CK     | LN    | MN    | HN    |
|--------------------------------|--------|-------|-------|-------|
| Number of nodes                | 356    | 375   | 376   | 371   |
| Number of edges                | 2090   | 1522  | 1351  | 1803  |
| Average Degree                 | 11.742 | 8.117 | 7.186 | 9.72  |
| Average Weighted Degree        | 1.492  | 0.889 | 0.969 | 1.257 |
| Network Diameter               | 9      | 12    | 11    | 10    |
| Average Path length            | 3.771  | 4.324 | 4.370 | 3.982 |
| Network density                | 0.033  | 0.021 | 0.019 | 0.026 |
| Modularity                     | 3.468  | 3.502 | 2.993 | 3.206 |
| Average Clustering Coefficient | 0.425  | 0.361 | 0.367 | 0.384 |
